# Supplementary material for: Long Non-Coding RNA RP5-821D11.7 Promotes Proliferation, Migration, and Epithelial-Mesenchymal Transition in Glioma and Glioma Stem-Like Cells
Source: Research Square preprint supplement (doi:10.21203/rs.3.rs-524203/v1), 2021-05-21
Supplement: Supplementary file 1 [file 5a2639e5056b01547582768d.docx]

**Supplementary Data File**

**Long non-Coding RNA RP5-821D11.7 Promotes Proliferation, Migration, and Epithelial-Mesenchymal Transition in Glioma and Glioma Stem-Like Cells**

Muhammad Younis1†, Sana Shaikh2†, Khawar Ali Shahzad3,4*, Nuzhat Sial3

1 Center for Infection and Immunity, the Fifth Affiliated Hospital, Sun Yat-sen University, Zhuhai, Guangdong Province, 519000, China

2 Key Laboratory for Developmental Genes and Human Disease, Ministry of Education, Institute of Life Sciences, Southeast University, Nanjing, 210096, China.

3 Department of Zoology, The Islamia University of Bahawalpur, Bahawalpur, Pakistan

4School of Pharmacy, Taizhou Polytechnic College, Taizhou, 225300, China

**
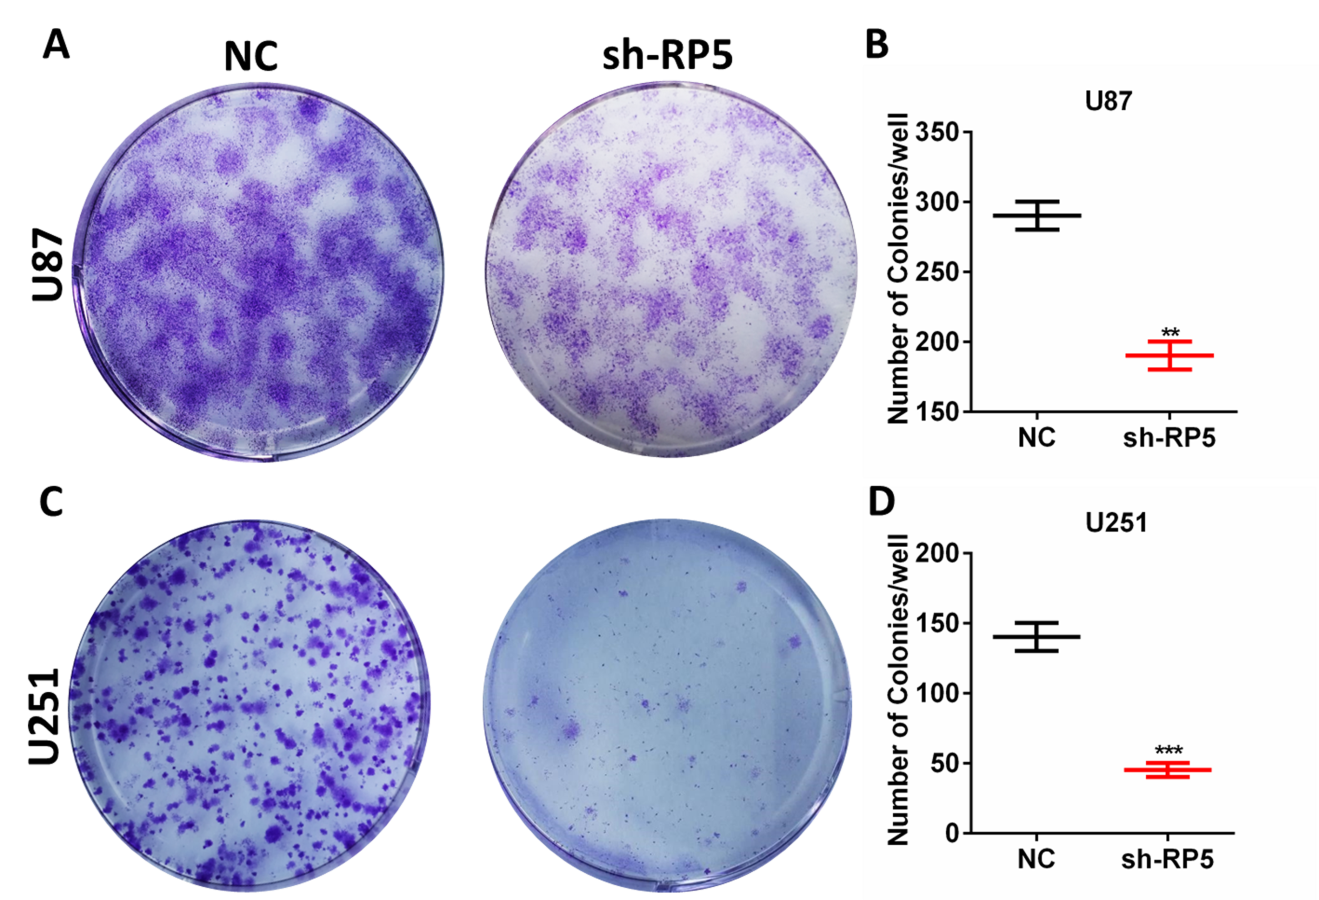
**

**Fig. S1:** **LncRNA-RP5 knockdown led to reduced colony numbers.** Numbers of colonies were suppressed in U87 and U251 glioma cells after lncRNA-RP5 targeted lentivirus transfection as compared to negative control (A, C). The graph shows the mean±SD from three independent experiments (C, D). (**p<0.01, ***P<0.001).


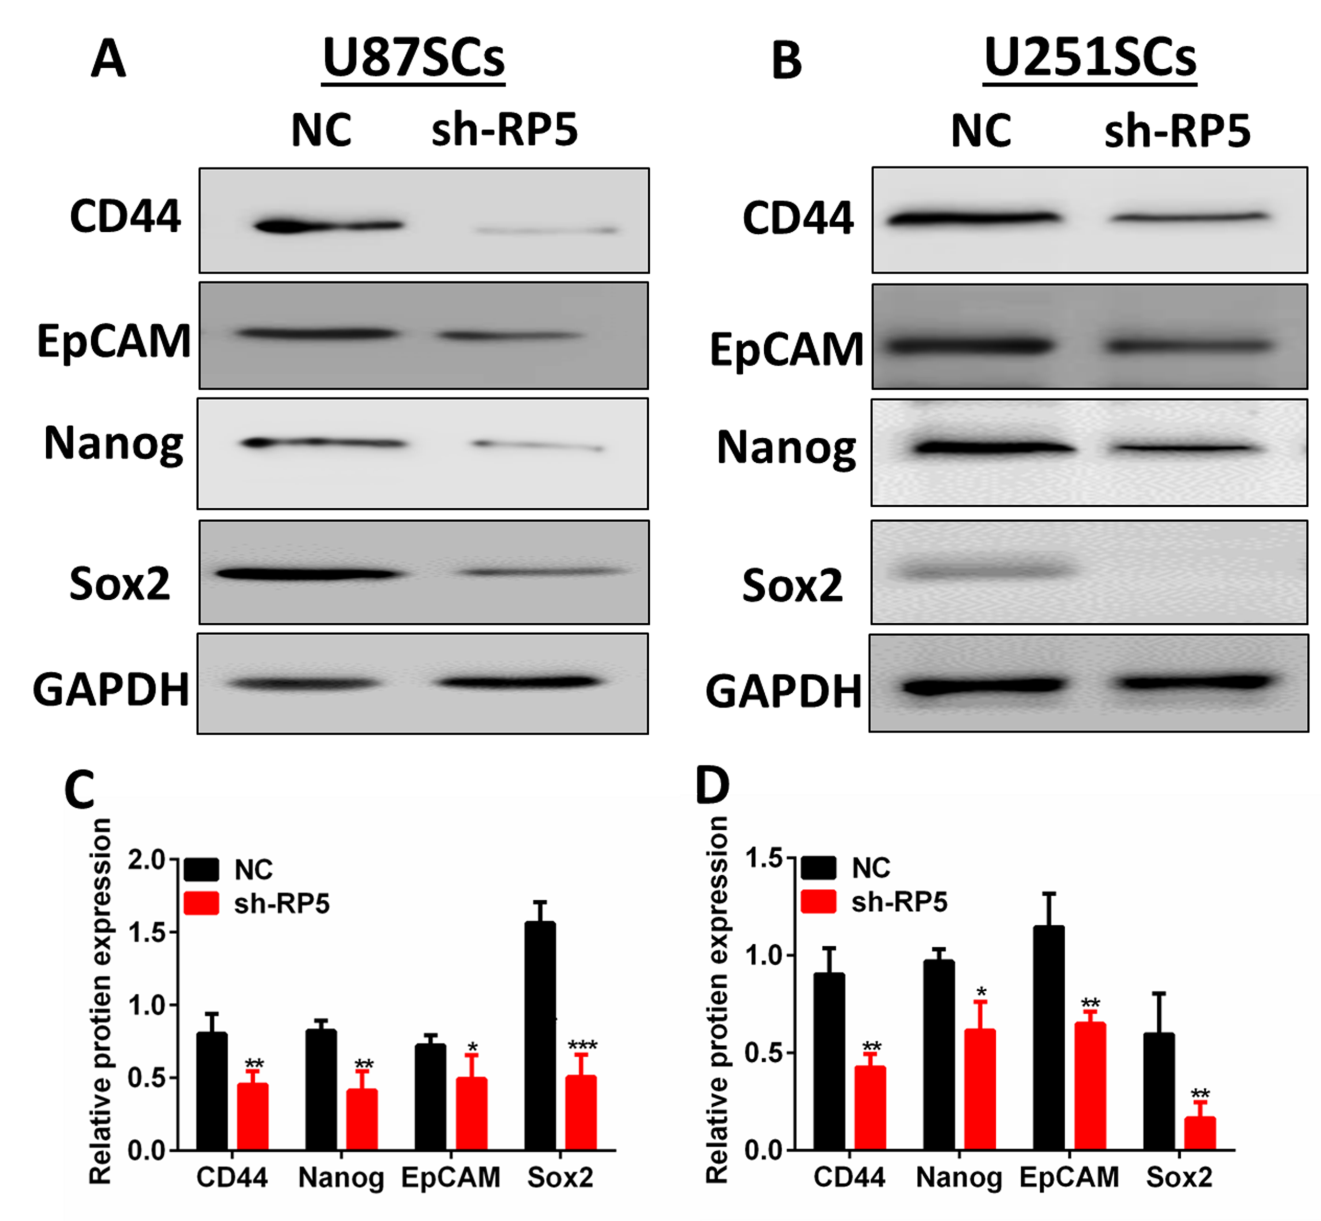


**Fig. S2: GSCs markers and genes of stem cells.** The expression levels of CD44, EpCAM Nanog, and Sox2 were examined by western blotting (A, B), and results indicated that GSCs markers and stem cell genes expression was significantly decreased in U87SCs and U251SCs after knockdown of lncRNA-RP5 through lentivirus (A, B). Error bars represent the mean ± SD of experiments (C, D). (*p<0.05, **p<0.01 and ***p<0.001).


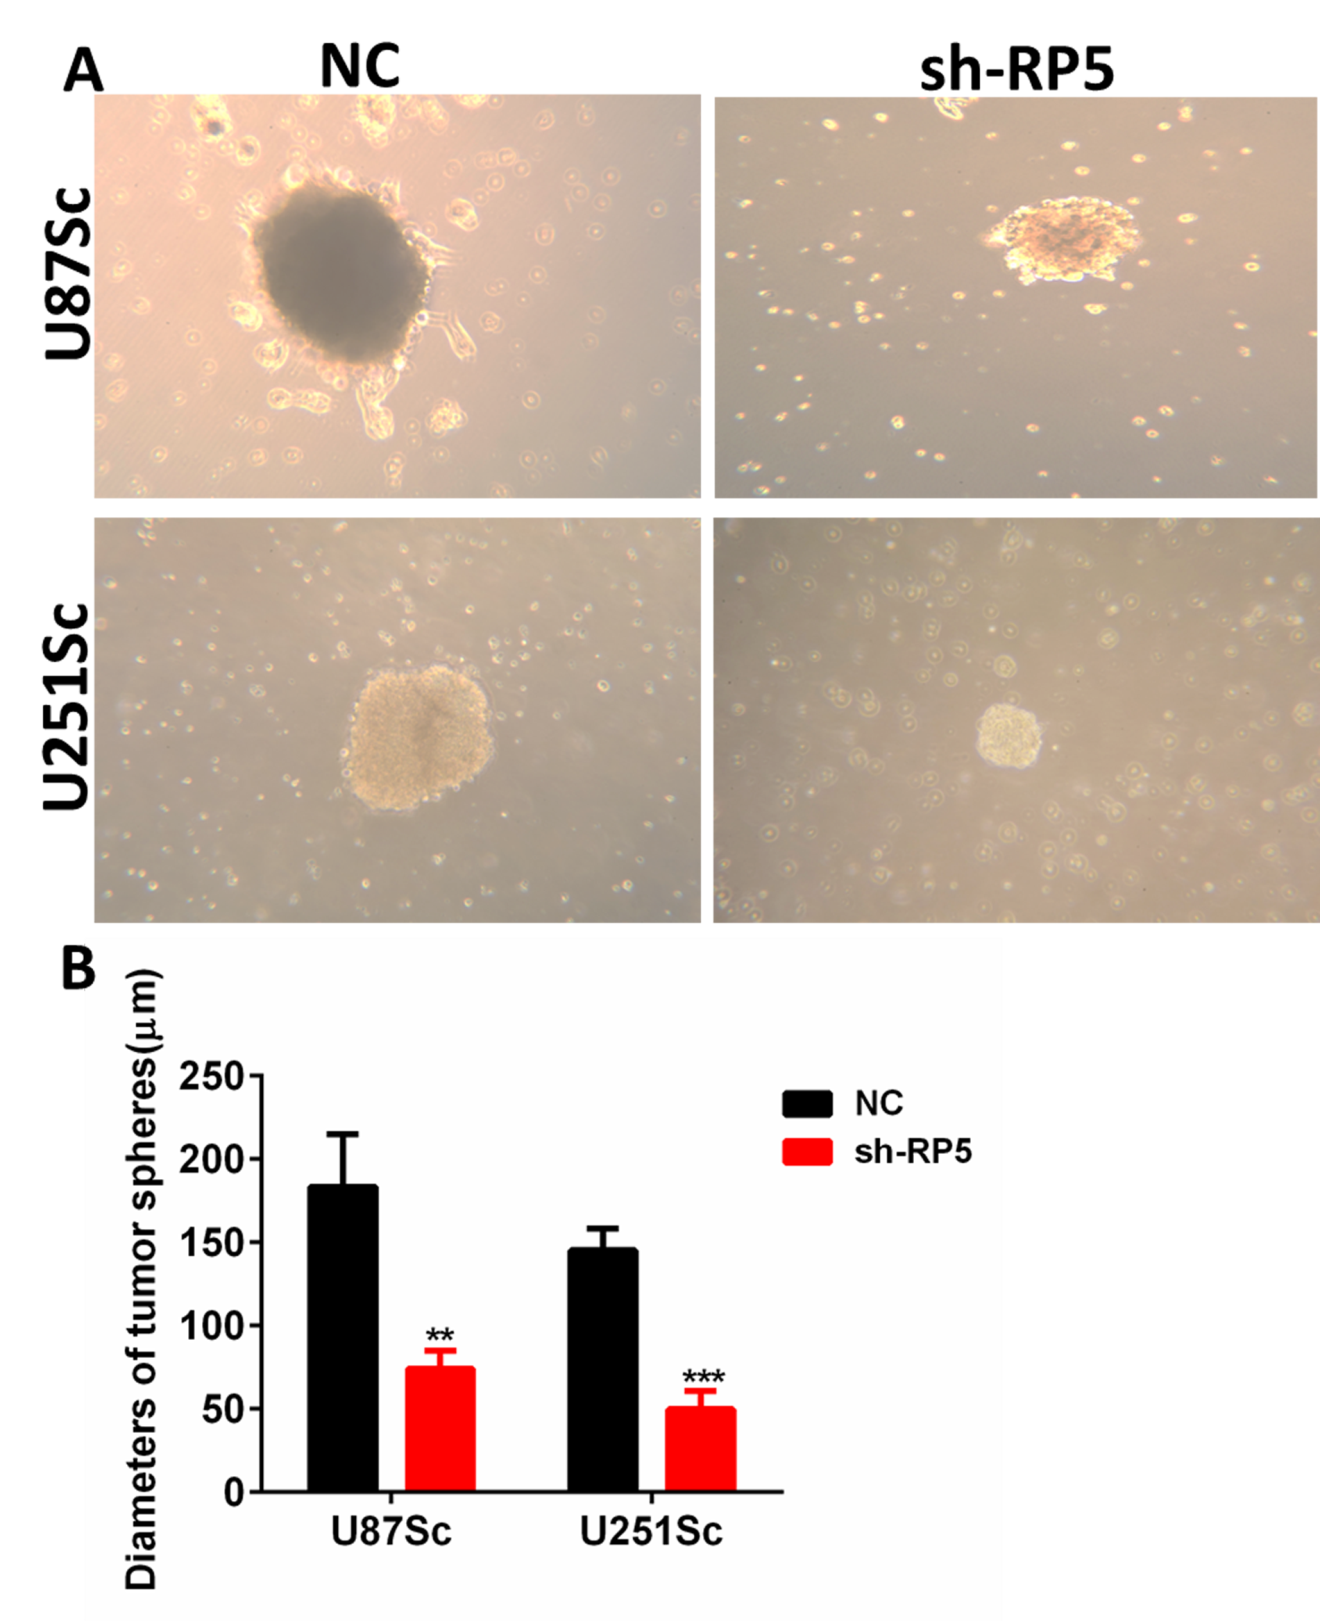


**Fig. S3:** **LncRNA-RP5 knockdown inhibited GSCs oncosphere formation.** Oncosphere diameter was decreased in sh-RP5 as compared to negative control (A). The graph indicates the differences in tumor sphere diameter in the mean±SD of the triplicate experiment (B-D). (**p<0.01, ***P<0.001)


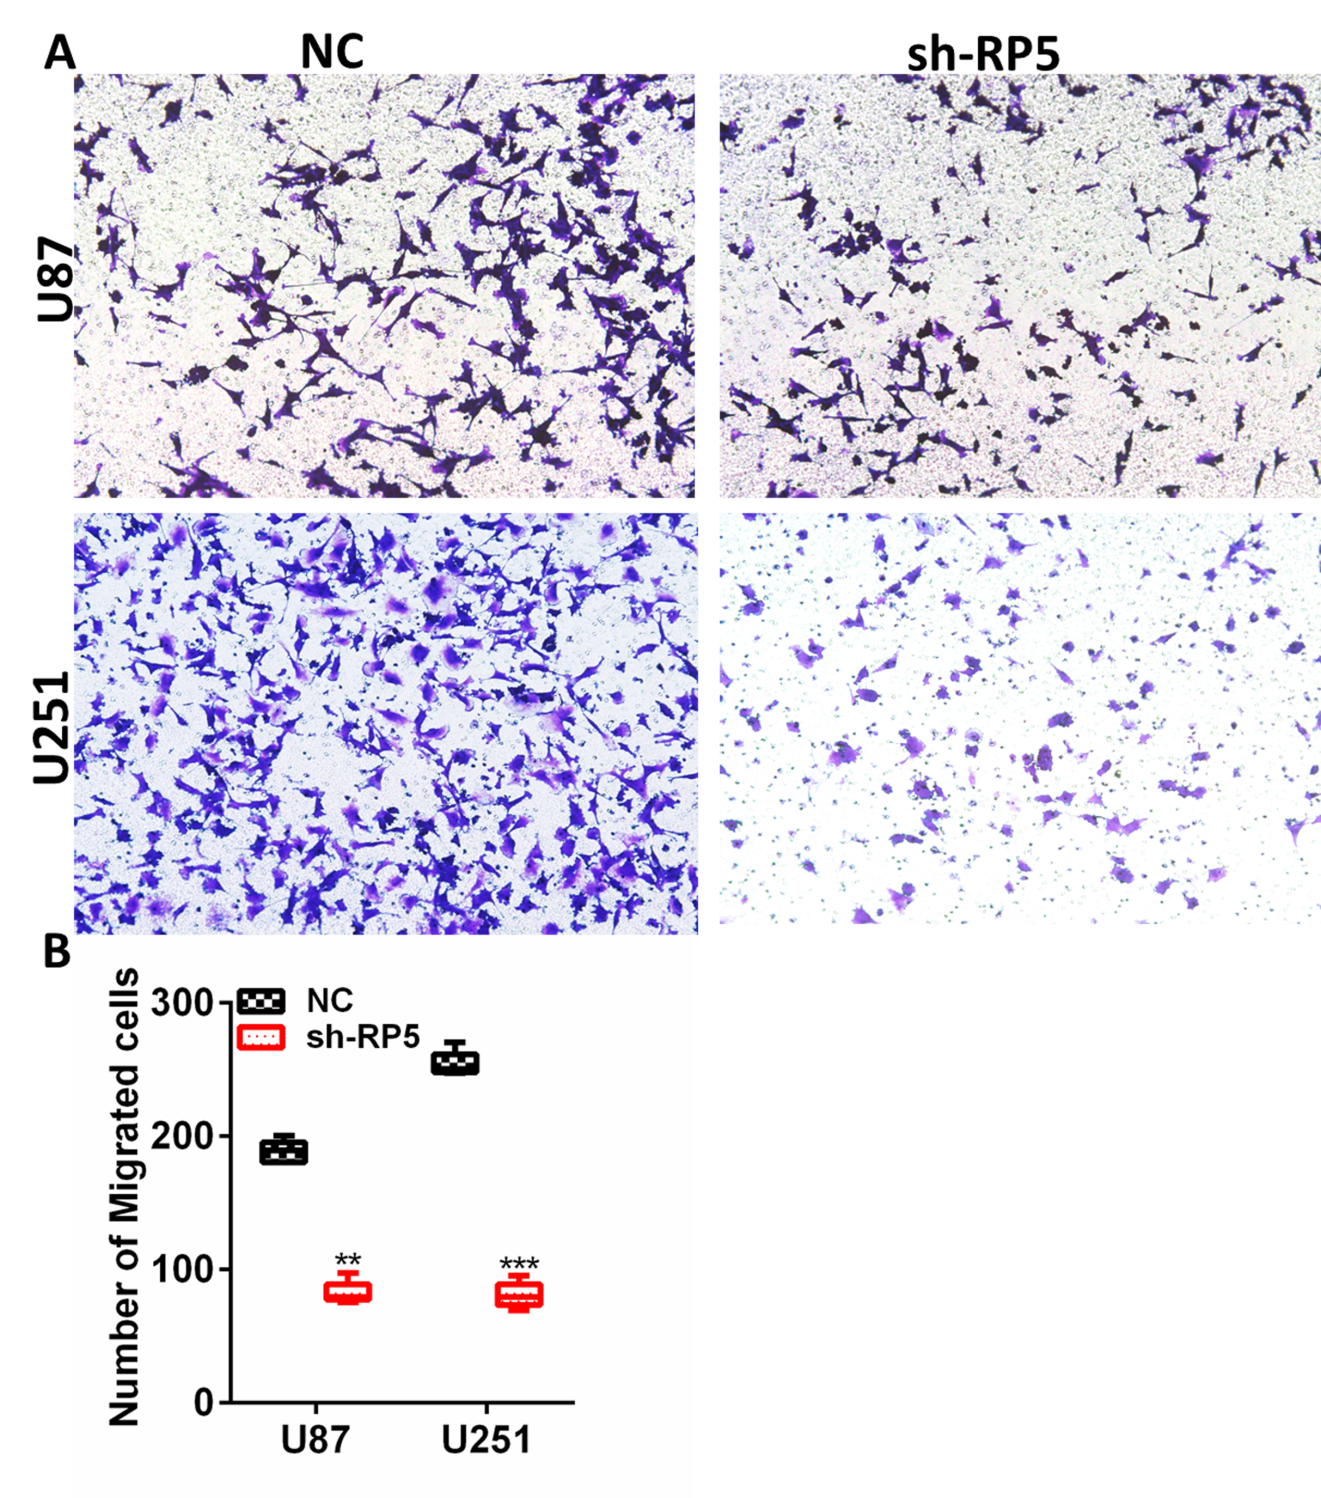


**Fig. S4: Knockdown of LncRNA-RP5 inhibits glioma and GSCs migration.** Migration rate significantly decrease in sh-RP5 glioma cell as compared to negative control (A).The graph shows the mean±SD of migrated cells from three independent experiments (B). (*p<0.05, ***p<0.001 and ****p<0.0001).
